# Supplementary material for: In situ formation of new organic ligands to construct two novel self-charge-transfer Pb(ii)-based frameworks
Source: Royal Society of Chemistry journal article supplement (doi:10.1039/c1ce06006f), 2011-11-07
Supplement: c1ce06006f.pdf [file c1ce06006f.pdf]

## Supporting Information for

### ***In situ* Formation of New Organic Ligands to Construct Two Novel Self-charge-transfer Pb(II)-based Frameworks**

Yi Liu,<sup>a</sup> Melvin Jun Wei Tan,<sup>a</sup> Fengxia Wei,<sup>a</sup> Yufeng Tian,<sup>b</sup> Tom Wu,<sup>b</sup> Christian Kloc,<sup>a</sup> Fengwei Huo,<sup>a</sup> Qingyu Yan,<sup>a</sup> Huey Hoon Hng,<sup>a</sup> Jan Ma,<sup>a</sup> Qichun Zhang<sup>\*a</sup>

<sup>a</sup> School of Materials Science and Engineering, Nanyang Technological University, 50 Nanyang Avenue, Singapore 639798, Singapore. Email: qc Zhang@ntu.edu.sg

<sup>b</sup> Division of Physics and Applied Physics, School of Physical and Mathematical Sciences, Nanyang Technological University, Singapore 637371, Singapore.

#### **Materials and methods**

All the chemicals used for synthesis are of analytical grade and commercially available. Pb(SC<sub>6</sub>H<sub>5</sub>)<sub>2</sub> was synthesized according to the reported method.<sup>1</sup> The IR spectrum was obtained on a Perkin-Elmer FT-IR spectrophotometer in the 400–4000 cm<sup>-1</sup> region with a KBr pellet. Elemental analyses were performed on a Perkin-Elmer 2400 Elemental Analyzer. Thermal stability studies were carried out on a TGA Q500 instrument under N<sub>2</sub> at a heating rate of 10 °C. The DC magnetic susceptibility measurements were made on an MPMS magnetometer at temperatures between 5.0 and 273 K. The optical diffuse reflectance spectra were measured at room temperature on a Perkin-Elmer Lambda 900 UV–vis-NIR spectro-meter equipped with an integrating sphere. BaSO<sub>4</sub> was used as the reference material, and the polycrystalline samples were ground well before the measurement. The absorption ( $\alpha/S$ ) data were calculated from the reflectance using the Kubelka–Munk function:  $\alpha/S = (1-R)^2/2R$ , in which R is the reflectance at a given wavelength,  $\alpha$  is the absorption coefficient, and S is the scattering coefficient.<sup>2</sup> Powder X-ray diffraction data were recorded on a Bruker D8 Advance diffractometer with a graphite-monochromatized Cu *K* $\alpha$  radiation. The operating 2 $\theta$  angle ranges from 10° to 55°. Simulation of the XRD pattern was carried out by the single-crystal data and diffraction-crystal

module of the Mercury (Hg) program version 1.4.2 available free of charge via the Internet at <http://www.iucr.org>.

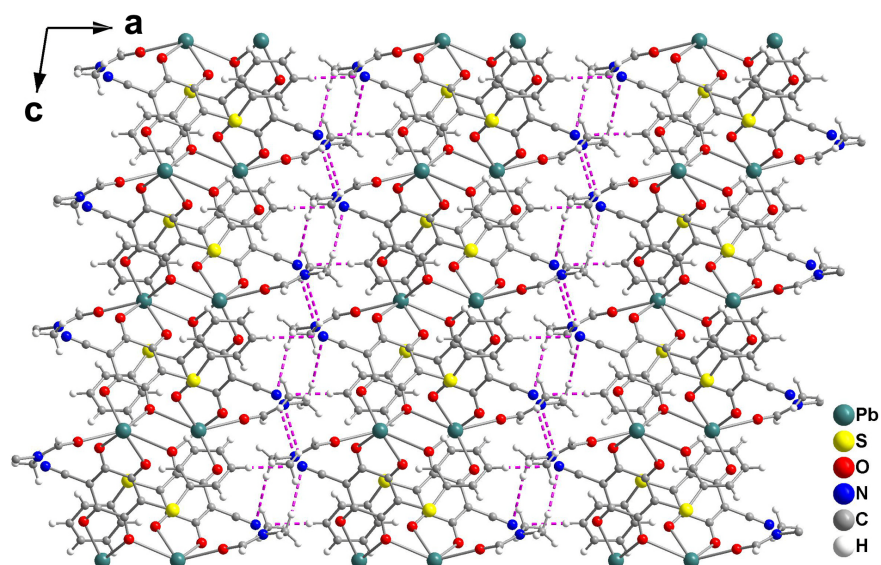

Figure S1. View of the 2D layered structure of **2** along the *b*-axis.

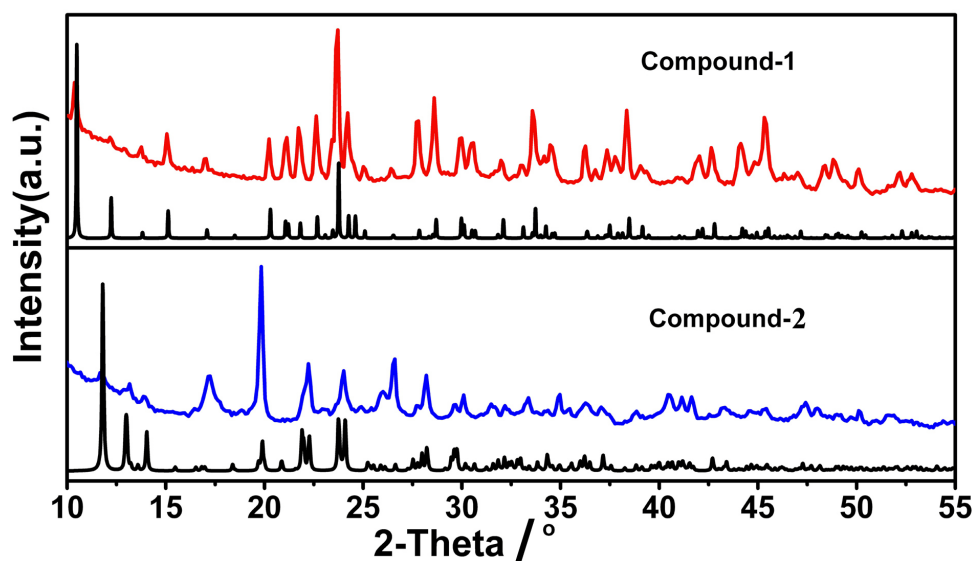

Figure S2. Experimental and simulated XRD patterns of compounds **1** and **2**.

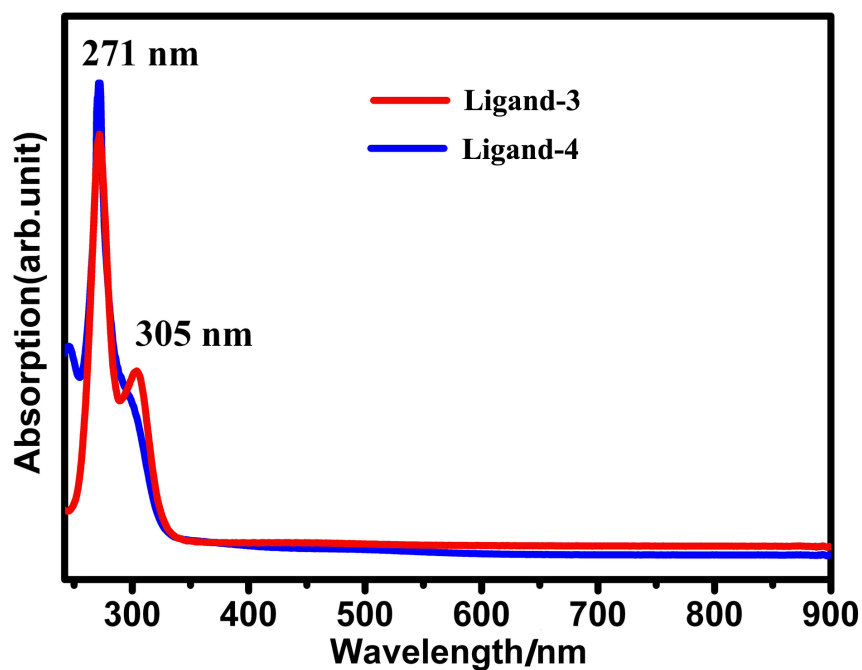

**Figure S3.** The UV-Vis absorption of in-situ formed organic ligands **3** and **4**.

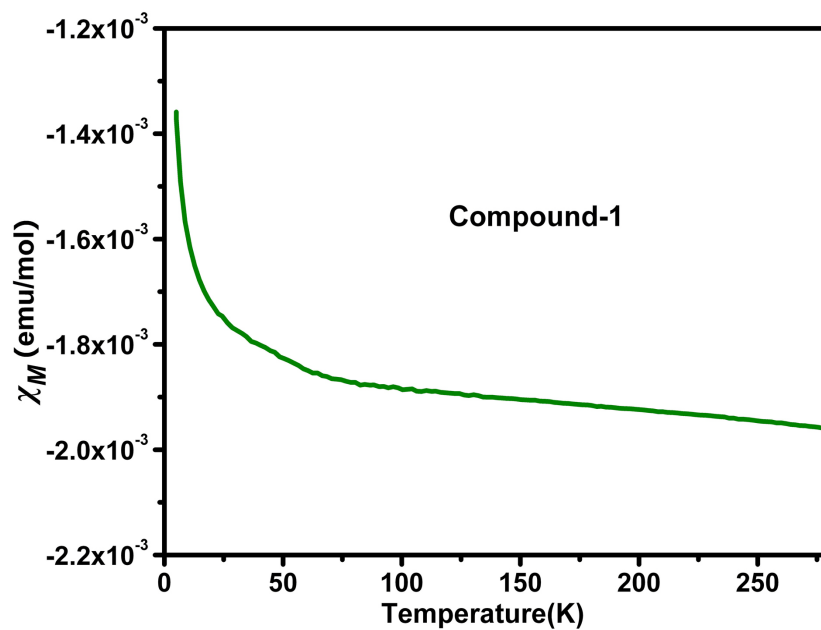

**Figure S4.** Molar susceptibilities as a function of temperature for **1**, measured in an applied field of 5 kOe.

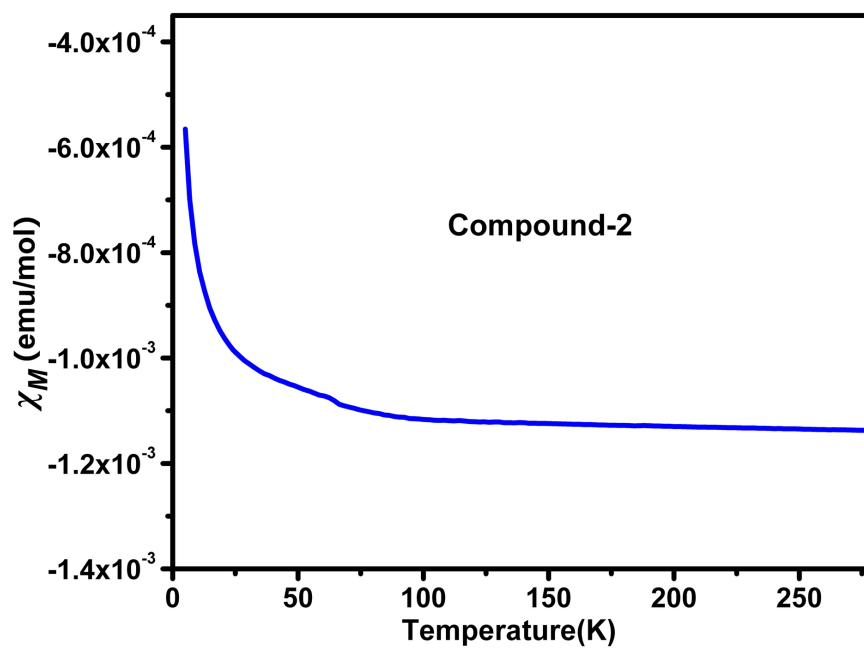

**Figure S5.** Molar susceptibilities as a function of temperature for **2**, measured in an applied field of 5 kOe.

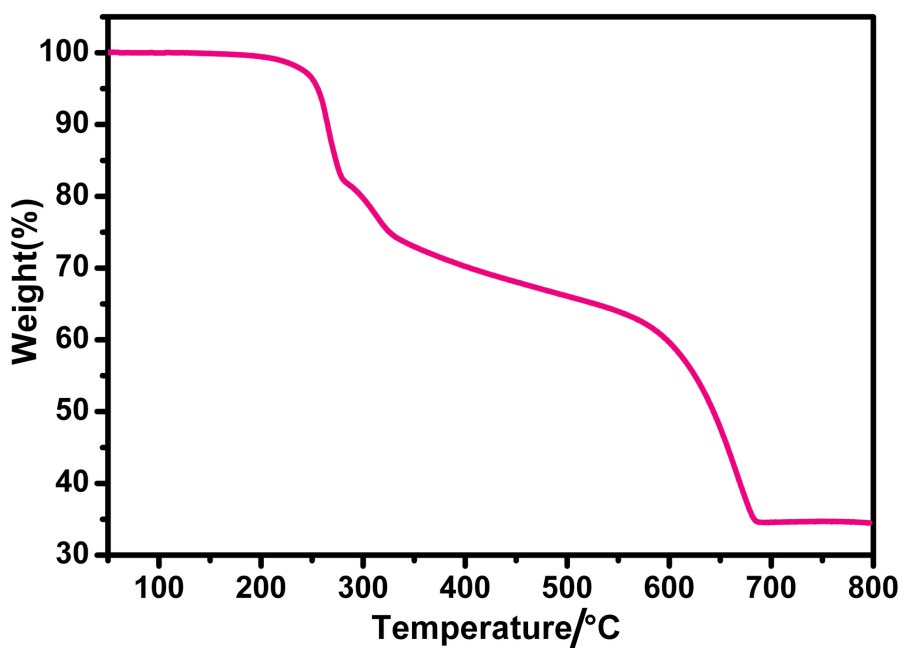

**Figure S6.** TGA curve of **1** in  $N_2$  with a heating rate of  $10^\circ C$ .

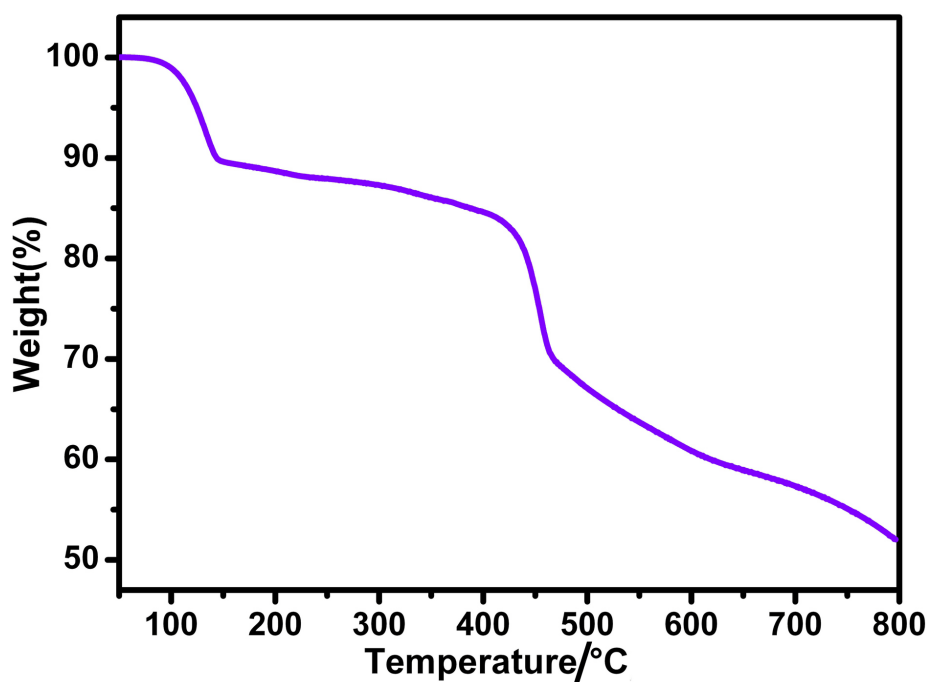

Figure S7. TGA curve of **2** in N<sub>2</sub> with a heating rate of 10 °C.

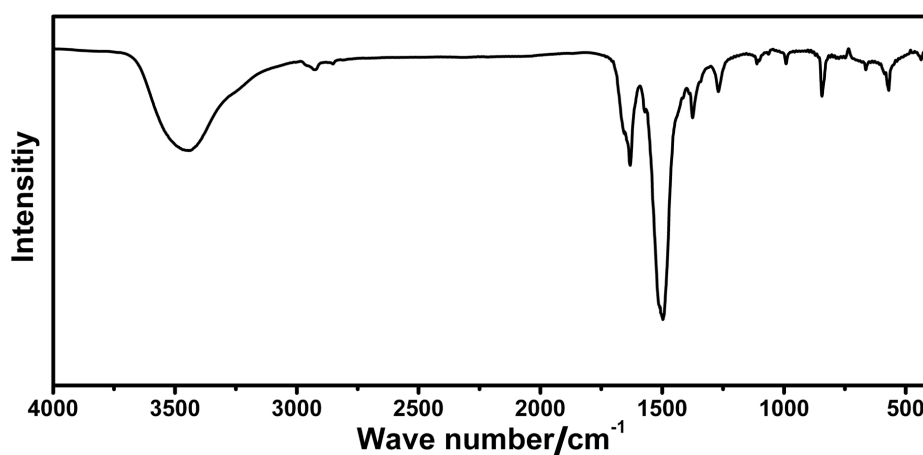

Figure S8. FT-IR spectrum of **1** (cm<sup>-1</sup>): 2955 (w,  $\nu(\text{C-H})$ ), 1631 (s,  $\delta(\text{C=O})$ ), 1497 (vs,  $\delta(\text{C=C})$ ), 1375 (m,  $\nu(\text{C-C})$ ), 1269 (m,  $\nu(\text{C-N})$ ), 1111 (w,  $\nu(\text{C-N})$ ), 991 (w,  $\nu(\text{C-O})$ ), 844 (m,  $\nu(\text{C-O})$ ), 570 (m  $\nu(\text{C-Cl})$ )

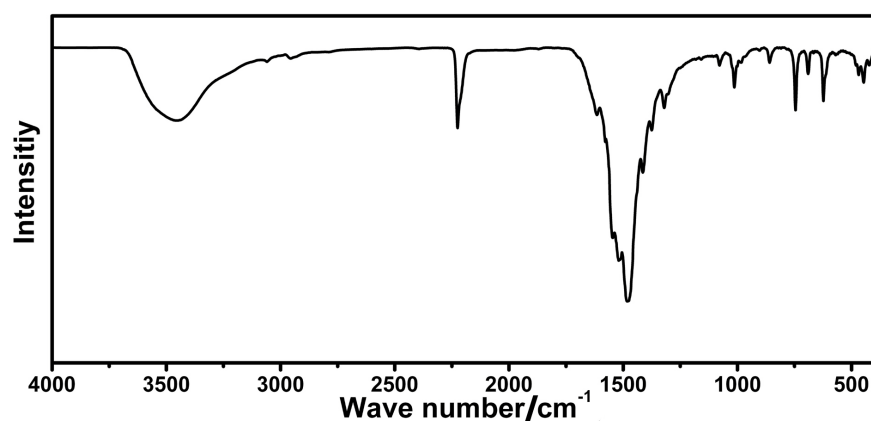

**Figure S9.** IR spectrum of **2** ( $\text{cm}^{-1}$ ): 2929 (w,  $\nu(\text{C-H})$ ), 2225 (m,  $\nu(\text{C}\equiv\text{N})$ ), 1614 (m,  $\delta(\text{C=O})$ ), 1578 (s,  $\delta(\text{C=C})$ ), 1545 (vs,  $\delta(\text{C=C})$ ), 1519 (vs,  $\delta(\text{C=C})$ ), 1482 (vs,  $\delta(\text{C=C})$ ), 1413 (s,  $\delta(\text{C=C})$ ), 1374 (m,  $\nu(\text{C-C})$ ), 1320 (m,  $\nu(\text{C-N})$ ), 1078 (w,  $\nu(\text{C-S})$ ), 1013 (w,  $\nu(\text{C-S})$ ), 859 (w,  $\delta(=\text{CH})$ ), 745 (m,  $\delta(=\text{CH})$ ), 623 (m  $\delta(=\text{CH})$ )

## References

- 1 R. A. Shaw and M. Woods, *J. Chem. Soc.*, **1971**, 1569.
- 2 G. Kortüm, *Reflectance Spectroscopy*, Springer, New York, **1969**.
